# Supplementary material for: Partial nephrogenic diabetes insipidus caused by a novel AQP2 variation impairing trafficking of the aquaporin-2 water channel
Source: Springer Nature journal article supplement (doi:10.1186/s12882-015-0213-3), 2015-12-01

Additional file1: Co-localization analysis using GFP-tagged Rab 9 for labeling of late endosomes

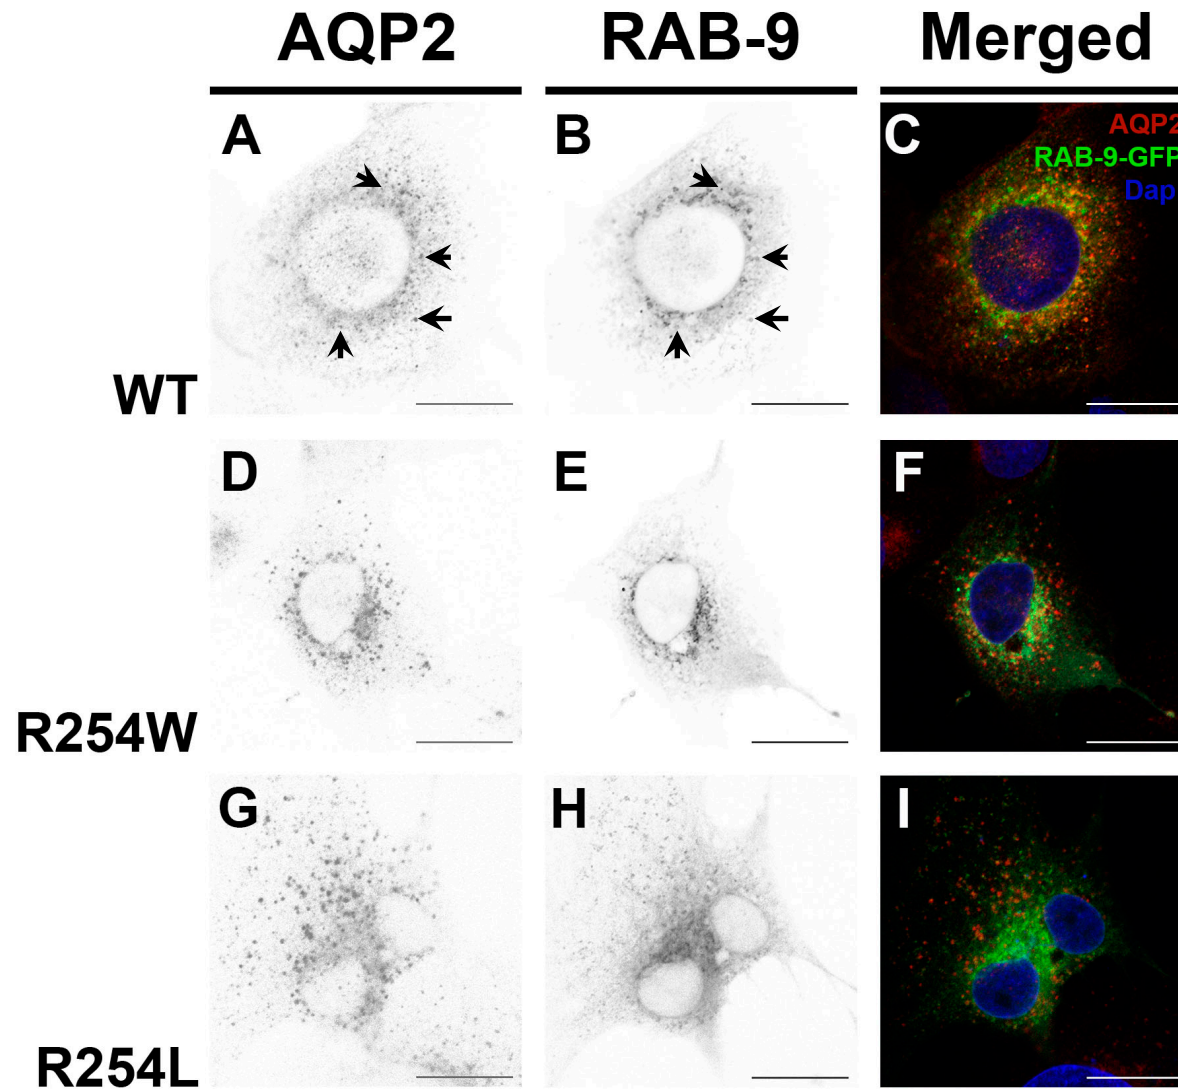

Supplement: MOESM1 [file 9741928]
